# Supplementary material for: COVID-19 and Mental Illnesses in Vaccinated and Unvaccinated People
Source: PubMed Central journal article supplement (PMC11339697; doi:10.1001/jamapsychiatry.2024.2339), 2024-08-21
Supplement: jamapsychiatry-e242339-s002.pdf [file jamapsychiatry-e242339-s002.pdf]

Supplemental Online Content: Nonauthor Collaborators

\*First name, last name, and suffix (if applicable) are required and will appear in PubMed.

| <b>*Group Name(s): Longitudinal Health and Wellbeing COVID-19 National Core Study</b> |                            |                              |                  |             |                                          |                                                         |                                                                                            |
|---------------------------------------------------------------------------------------|----------------------------|------------------------------|------------------|-------------|------------------------------------------|---------------------------------------------------------|--------------------------------------------------------------------------------------------|
| <b>*First Name and Middle Initial(s)</b>                                              | <b>*Last Name</b>          | <b>*Suffix (eg, Jr, III)</b> | Academic Degrees | Institution | Location (city, state/province, country) | Role or Contribution, eg, chair, principal investigator | Group (if more than 1 Group listed in the byline) and/or Subgroup (eg, Steering Committee) |
| Agnieszka                                                                             | Lemanska                   |                              |                  |             |                                          |                                                         |                                                                                            |
| Alex                                                                                  | Kwong                      |                              |                  |             |                                          |                                                         |                                                                                            |
| Alexia                                                                                | Sampri                     |                              |                  |             |                                          |                                                         |                                                                                            |
| Alicja                                                                                | Rapala                     |                              |                  |             |                                          |                                                         |                                                                                            |
| Alisia                                                                                | Carnemolla                 |                              |                  |             |                                          |                                                         |                                                                                            |
| Alun                                                                                  | Hughes                     |                              |                  |             |                                          |                                                         |                                                                                            |
| Amelia                                                                                | Green                      |                              |                  |             |                                          |                                                         |                                                                                            |
| Amos                                                                                  | Folarin                    |                              |                  |             |                                          |                                                         |                                                                                            |
| Amy                                                                                   | Roberts                    |                              |                  |             |                                          |                                                         |                                                                                            |
| Ana                                                                                   | Goncalves<br>Soares        |                              |                  |             |                                          |                                                         |                                                                                            |
| Andrew                                                                                | Steptoe                    |                              |                  |             |                                          |                                                         |                                                                                            |
| Andrew                                                                                | Wong                       |                              |                  |             |                                          |                                                         |                                                                                            |
| Andy                                                                                  | Boyd                       |                              |                  |             |                                          |                                                         |                                                                                            |
| Andy                                                                                  | Gibson                     |                              |                  |             |                                          |                                                         |                                                                                            |
| Anika                                                                                 | Knueppel                   |                              |                  |             |                                          |                                                         |                                                                                            |
| Anoop                                                                                 | Shah                       |                              |                  |             |                                          |                                                         |                                                                                            |
| Archie                                                                                | Campbell                   |                              |                  |             |                                          |                                                         |                                                                                            |
| Arun                                                                                  | Kanagaratnam               |                              |                  |             |                                          |                                                         |                                                                                            |
| Arun                                                                                  | Karthikeyan<br>Suseeladevi |                              |                  |             |                                          |                                                         |                                                                                            |
| Bang                                                                                  | Zheng                      |                              |                  |             |                                          |                                                         |                                                                                            |
| Betty                                                                                 | Raman                      |                              |                  |             |                                          |                                                         |                                                                                            |
| Bo                                                                                    | Hou                        |                              |                  |             |                                          |                                                         |                                                                                            |
| Bozena                                                                                | Wielgoszewska              |                              |                  |             |                                          |                                                         |                                                                                            |
| Brain                                                                                 | Mackenna                   |                              |                  |             |                                          |                                                         |                                                                                            |
| Callum                                                                                | Stewart                    |                              |                  |             |                                          |                                                         |                                                                                            |
| Chao                                                                                  | Fang                       |                              |                  |             |                                          |                                                         |                                                                                            |
| Charis                                                                                | Bridger-Staatz             |                              |                  |             |                                          |                                                         |                                                                                            |

Supplemental Online Content: Nonauthor Collaborators

\*First name, last name, and suffix (if applicable) are required and will appear in PubMed.

| *First Name and Middle Initial(s) | *Last Name  | *Suffix (eg, Jr, III) | Academic Degrees | Institution | Location (city, state/province, country) | Role or Contribution, eg, chair, principal investigator | Group (if more than 1 Group listed in the byline) and/or Subgroup (eg, Steering Committee) |
|-----------------------------------|-------------|-----------------------|------------------|-------------|------------------------------------------|---------------------------------------------------------|--------------------------------------------------------------------------------------------|
| Charlotte                         | Booth       |                       |                  |             |                                          |                                                         |                                                                                            |
| Chelsea                           | Beckford    |                       |                  |             |                                          |                                                         |                                                                                            |
| Chloe                             | Park        |                       |                  |             |                                          |                                                         |                                                                                            |
| Claire                            | Steves      |                       |                  |             |                                          |                                                         |                                                                                            |
| Colm                              | Andrews     |                       |                  |             |                                          |                                                         |                                                                                            |
| Daniel                            | McCartney   |                       |                  |             |                                          |                                                         |                                                                                            |
| Daniel                            | Kopasker    |                       |                  |             |                                          |                                                         |                                                                                            |
| Diane                             | Foster      |                       |                  |             |                                          |                                                         |                                                                                            |
| Dominik                           | Piehlmaier  |                       |                  |             |                                          |                                                         |                                                                                            |
| Dylan                             | Williams    |                       |                  |             |                                          |                                                         |                                                                                            |
| Edward                            | Parker      |                       |                  |             |                                          |                                                         |                                                                                            |
| Elena                             | Rafeti      |                       |                  |             |                                          |                                                         |                                                                                            |
| Elena                             | Lukaschuk   |                       |                  |             |                                          |                                                         |                                                                                            |
| Elizabeth                         | Tunncliffe  |                       |                  |             |                                          |                                                         |                                                                                            |
| Ellena                            | Badrick     |                       |                  |             |                                          |                                                         |                                                                                            |
| Emily                             | Herrett     |                       |                  |             |                                          |                                                         |                                                                                            |
| Emma L                            | Turner      |                       |                  |             |                                          |                                                         |                                                                                            |
| Eoin                              | McElroy     |                       |                  |             |                                          |                                                         |                                                                                            |
| Fatima                            | Almaghrabi  |                       |                  |             |                                          |                                                         |                                                                                            |
| Felix                             | Greaves     |                       |                  |             |                                          |                                                         |                                                                                            |
| Fintan                            | McArdle     |                       |                  |             |                                          |                                                         |                                                                                            |
| Fiona                             | Glen        |                       |                  |             |                                          |                                                         |                                                                                            |
| Francisco                         | Perez-Reche |                       |                  |             |                                          |                                                         |                                                                                            |
| Gareth                            | Griffith    |                       |                  |             |                                          |                                                         |                                                                                            |
| George                            | Ploubidis   |                       |                  |             |                                          |                                                         |                                                                                            |
| Gillian                           | Santorelli  |                       |                  |             |                                          |                                                         |                                                                                            |
| Giorgio                           | Di Gessa    |                       |                  |             |                                          |                                                         |                                                                                            |
| Hannah                            | Woodward    |                       |                  |             |                                          |                                                         |                                                                                            |
| Helen                             | Curtis      |                       |                  |             |                                          |                                                         |                                                                                            |
| Annie                             | Herbert     |                       |                  |             |                                          |                                                         |                                                                                            |
| Ian                               | Douglas     |                       |                  |             |                                          |                                                         |                                                                                            |

Supplemental Online Content: Nonauthor Collaborators

\*First name, last name, and suffix (if applicable) are required and will appear in PubMed.

| *First Name and Middle Initial(s) | *Last Name   | *Suffix (eg, Jr, III) | Academic Degrees | Institution | Location (city, state/province, country) | Role or Contribution, eg, chair, principal investigator | Group (if more than 1 Group listed in the byline) and/or Subgroup (eg, Steering Committee) |
|-----------------------------------|--------------|-----------------------|------------------|-------------|------------------------------------------|---------------------------------------------------------|--------------------------------------------------------------------------------------------|
| Jacqui                            | Oakley       |                       |                  |             |                                          |                                                         |                                                                                            |
| James M                           | Wild         |                       |                  |             |                                          |                                                         |                                                                                            |
| Jane                              | Maddock      |                       |                  |             |                                          |                                                         |                                                                                            |
| JD                                | Carpentieri  |                       |                  |             |                                          |                                                         |                                                                                            |
| Jess                              | Morley       |                       |                  |             |                                          |                                                         |                                                                                            |
| Jingmin                           | Zhu          |                       |                  |             |                                          |                                                         |                                                                                            |
| John                              | Tazare       |                       |                  |             |                                          |                                                         |                                                                                            |
| John                              | Wright       |                       |                  |             |                                          |                                                         |                                                                                            |
| John                              | Kellas       |                       |                  |             |                                          |                                                         |                                                                                            |
| Jonathan                          | Kennedy      |                       |                  |             |                                          |                                                         |                                                                                            |
| Kate                              | Northstone   |                       |                  |             |                                          |                                                         |                                                                                            |
| Kate                              | Tilling      |                       |                  |             |                                          |                                                         |                                                                                            |
| Kate                              | Mansfield    |                       |                  |             |                                          |                                                         |                                                                                            |
| Katharine M                       | Evans        |                       |                  |             |                                          |                                                         |                                                                                            |
| Kathryn                           | Mansfield    |                       |                  |             |                                          |                                                         |                                                                                            |
| Kathryn                           | Willan       |                       |                  |             |                                          |                                                         |                                                                                            |
| Kevin                             | Wang         |                       |                  |             |                                          |                                                         |                                                                                            |
| Kirsteen C                        | Campbell     |                       |                  |             |                                          |                                                         |                                                                                            |
| Kishan                            | Patel        |                       |                  |             |                                          |                                                         |                                                                                            |
| Laura                             | Fox          |                       |                  |             |                                          |                                                         |                                                                                            |
| Laura                             | Sheard       |                       |                  |             |                                          |                                                         |                                                                                            |
| Laura C                           | Saunders     |                       |                  |             |                                          |                                                         |                                                                                            |
| Laurie                            | Tomlinson    |                       |                  |             |                                          |                                                         |                                                                                            |
| Lee                               | Hamill Howes |                       |                  |             |                                          |                                                         |                                                                                            |
| Liam                              | Smeeth       |                       |                  |             |                                          |                                                         |                                                                                            |
| Lidia                             | Nigrelli     |                       |                  |             |                                          |                                                         |                                                                                            |
| Linda                             | Nab          |                       |                  |             |                                          |                                                         |                                                                                            |
| Lisa                              | Hopcroft     |                       |                  |             |                                          |                                                         |                                                                                            |
| Lizzie                            | Huntley      |                       |                  |             |                                          |                                                         |                                                                                            |
| Louise                            | Jones        |                       |                  |             |                                          |                                                         |                                                                                            |
| Lucy                              | Finnigan     |                       |                  |             |                                          |                                                         |                                                                                            |

## Supplemental Online Content: Nonauthor Collaborators

\*First name, last name, and suffix (if applicable) are required and will appear in PubMed.

| *First Name and Middle Initial(s) | *Last Name | *Suffix (eg, Jr, III) | Academic Degrees | Institution | Location (city, state/province, country) | Role or Contribution, eg, chair, principal investigator | Group (if more than 1 Group listed in the byline) and/or Subgroup (eg, Steering Committee) |
|-----------------------------------|------------|-----------------------|------------------|-------------|------------------------------------------|---------------------------------------------------------|--------------------------------------------------------------------------------------------|
| Lucy                              | Teece      |                       |                  |             |                                          |                                                         |                                                                                            |
| Mark                              | Green      |                       |                  |             |                                          |                                                         |                                                                                            |
| Matthew                           | Crane      |                       |                  |             |                                          |                                                         |                                                                                            |
| Maxim                             | Freydin    |                       |                  |             |                                          |                                                         |                                                                                            |
| Michael                           | Parker     |                       |                  |             |                                          |                                                         |                                                                                            |
| Michael                           | Green      |                       |                  |             |                                          |                                                         |                                                                                            |
| Milla                             | Kibble     |                       |                  |             |                                          |                                                         |                                                                                            |
| Nathan                            | Cheetham   |                       |                  |             |                                          |                                                         |                                                                                            |
| Nicholas                          | Timpson    |                       |                  |             |                                          |                                                         |                                                                                            |
| Olivia                            | Hamilton   |                       |                  |             |                                          |                                                         |                                                                                            |
| Paola                             | Zaninotto  |                       |                  |             |                                          |                                                         |                                                                                            |
| Paz                               | Garcia     |                       |                  |             |                                          |                                                         |                                                                                            |
| Peter                             | Jezard     |                       |                  |             |                                          |                                                         |                                                                                            |
| Rebecca                           | Whitehorn  |                       |                  |             |                                          |                                                         |                                                                                            |
| Rebecca                           | Rhead      |                       |                  |             |                                          |                                                         |                                                                                            |
| Renin                             | Toms       |                       |                  |             |                                          |                                                         |                                                                                            |
| Richard                           | Thomas     |                       |                  |             |                                          |                                                         |                                                                                            |
| Richard                           | Silverwood |                       |                  |             |                                          |                                                         |                                                                                            |
| Richard                           | Dobson     |                       |                  |             |                                          |                                                         |                                                                                            |
| Robert                            | Willans    |                       |                  |             |                                          |                                                         |                                                                                            |
| Robin                             | Flaig      |                       |                  |             |                                          |                                                         |                                                                                            |
| Rosie                             | McEachan   |                       |                  |             |                                          |                                                         |                                                                                            |
| Ruth                              | Mitchell   |                       |                  |             |                                          |                                                         |                                                                                            |
| Ruth                              | Bowyer     |                       |                  |             |                                          |                                                         |                                                                                            |
| Ruth                              | Costello   |                       |                  |             |                                          |                                                         |                                                                                            |
| Sam                               | Parsons    |                       |                  |             |                                          |                                                         |                                                                                            |
| Samantha                          | Berman     |                       |                  |             |                                          |                                                         |                                                                                            |
| Samantha                          | Ip         |                       |                  |             |                                          |                                                         |                                                                                            |
| Sarah                             | Baz        |                       |                  |             |                                          |                                                         |                                                                                            |
| Scott                             | Walker     |                       |                  |             |                                          |                                                         |                                                                                            |
| Shah                              | Syed Ahmar |                       |                  |             |                                          |                                                         |                                                                                            |

## Supplemental Online Content: Nonauthor Collaborators

\*First name, last name, and suffix (if applicable) are required and will appear in PubMed.

| *First Name and Middle Initial(s) | *Last Name     | *Suffix (eg, Jr, III) | Academic Degrees | Institution | Location (city, state/province, country) | Role or Contribution, eg, chair, principal investigator | Group (if more than 1 Group listed in the byline) and/or Subgroup (eg, Steering Committee) |
|-----------------------------------|----------------|-----------------------|------------------|-------------|------------------------------------------|---------------------------------------------------------|--------------------------------------------------------------------------------------------|
| Richard                           | Shaw           |                       |                  |             |                                          |                                                         |                                                                                            |
| Sheikh                            | Aziz           |                       |                  |             |                                          |                                                         |                                                                                            |
| Sinead                            | Langan         |                       |                  |             |                                          |                                                         |                                                                                            |
| Sinead                            | Brophy         |                       |                  |             |                                          |                                                         |                                                                                            |
| Spiros                            | Denaxas        |                       |                  |             |                                          |                                                         |                                                                                            |
| Stefan                            | Neubauer       |                       |                  |             |                                          |                                                         |                                                                                            |
| Stefan                            | Piechnik       |                       |                  |             |                                          |                                                         |                                                                                            |
| Stela                             | McLachlan      |                       |                  |             |                                          |                                                         |                                                                                            |
| Stephen                           | Smith          |                       |                  |             |                                          |                                                         |                                                                                            |
| Steve                             | Sharp          |                       |                  |             |                                          |                                                         |                                                                                            |
| Teri                              | North          |                       |                  |             |                                          |                                                         |                                                                                            |
| Theocharis                        | Kromydas       |                       |                  |             |                                          |                                                         |                                                                                            |
| Thomas                            | Cowling        |                       |                  |             |                                          |                                                         |                                                                                            |
| Tiffany                           | Yang           |                       |                  |             |                                          |                                                         |                                                                                            |
| Tom                               | Bolton         |                       |                  |             |                                          |                                                         |                                                                                            |
| Vanessa                           | Ferreira       |                       |                  |             |                                          |                                                         |                                                                                            |
| Vittal                            | Katikireddi    |                       |                  |             |                                          |                                                         |                                                                                            |
| Viyaasan                          | Mahalingasivam |                       |                  |             |                                          |                                                         |                                                                                            |
| Wels                              | Jacques        |                       |                  |             |                                          |                                                         |                                                                                            |
| William                           | Hulme          |                       |                  |             |                                          |                                                         |                                                                                            |
| Yatharth                          | Ranjan         |                       |                  |             |                                          |                                                         |                                                                                            |
| Zeena-Britt                       | Sanders        |                       |                  |             |                                          |                                                         |                                                                                            |
