# Supplementary material for: COVID-19 and Mental Illnesses in Vaccinated and Unvaccinated People
Source: PubMed Central journal article supplement (PMC11339697; doi:10.1001/jamapsychiatry.2024.2339), 2024-08-21
Supplement: jamapsychiatry-e242339-s003.pdf [file jamapsychiatry-e242339-s003.pdf]

## Data Sharing Statement

Walker. COVID-19 and Mental Illnesses in Vaccinated and Unvaccinated People. *JAMA Psychiatry*. Published August 21, 2024. doi:10.1001/jamapsychiatry.2024.2339

### Data

**Data available:** No

### Additional Information

**Explanation for why data not available:** All data were linked, stored and analysed securely within the OpenSAFELY platform: <https://www.opensafely.org/>. Data include pseudonymised data such as coded diagnoses, medications and physiological parameters. No free text data are included. All code and code lists are shared openly for review and re-use under an MIT open license (<https://github.com/opensafely/post-covid-mentalhealth>). Detailed pseudonymised patient data is potentially re-identifiable and therefore not shared.
